# Supplementary material
Source: publisher site journal article supplement (https://www.dovepress.com/article/545677)
Supplement: Supplementary file 1 [file 545677%20Revised%20%252509Supplementary%20Materials.docx]

**Supplementary Materials**

**Identification of oxidative stress-related shared biomarkers in vitiligo and periodontitis: A bioinformatics and machine learning study**

**Supplementary Figure 1. Removal of batch effects in vitiligo. (A, B)** Principal component analysis plots of samples from datasets GSE65127 and GSE75819 are shown (A) before and (B) after the removal of batch effects.

**Supplementary Table 1.** The 58 overlapping DEGs identified in periodontitis and vitiligo.

**Supplementary Table 2.** The 93 shared genes identified by integrating DEGs and key WGCNA module genes.

**Supplementary Table 3.** The 570 potential therapeutic agents for the hub genes identified by the DSigDB database.

**
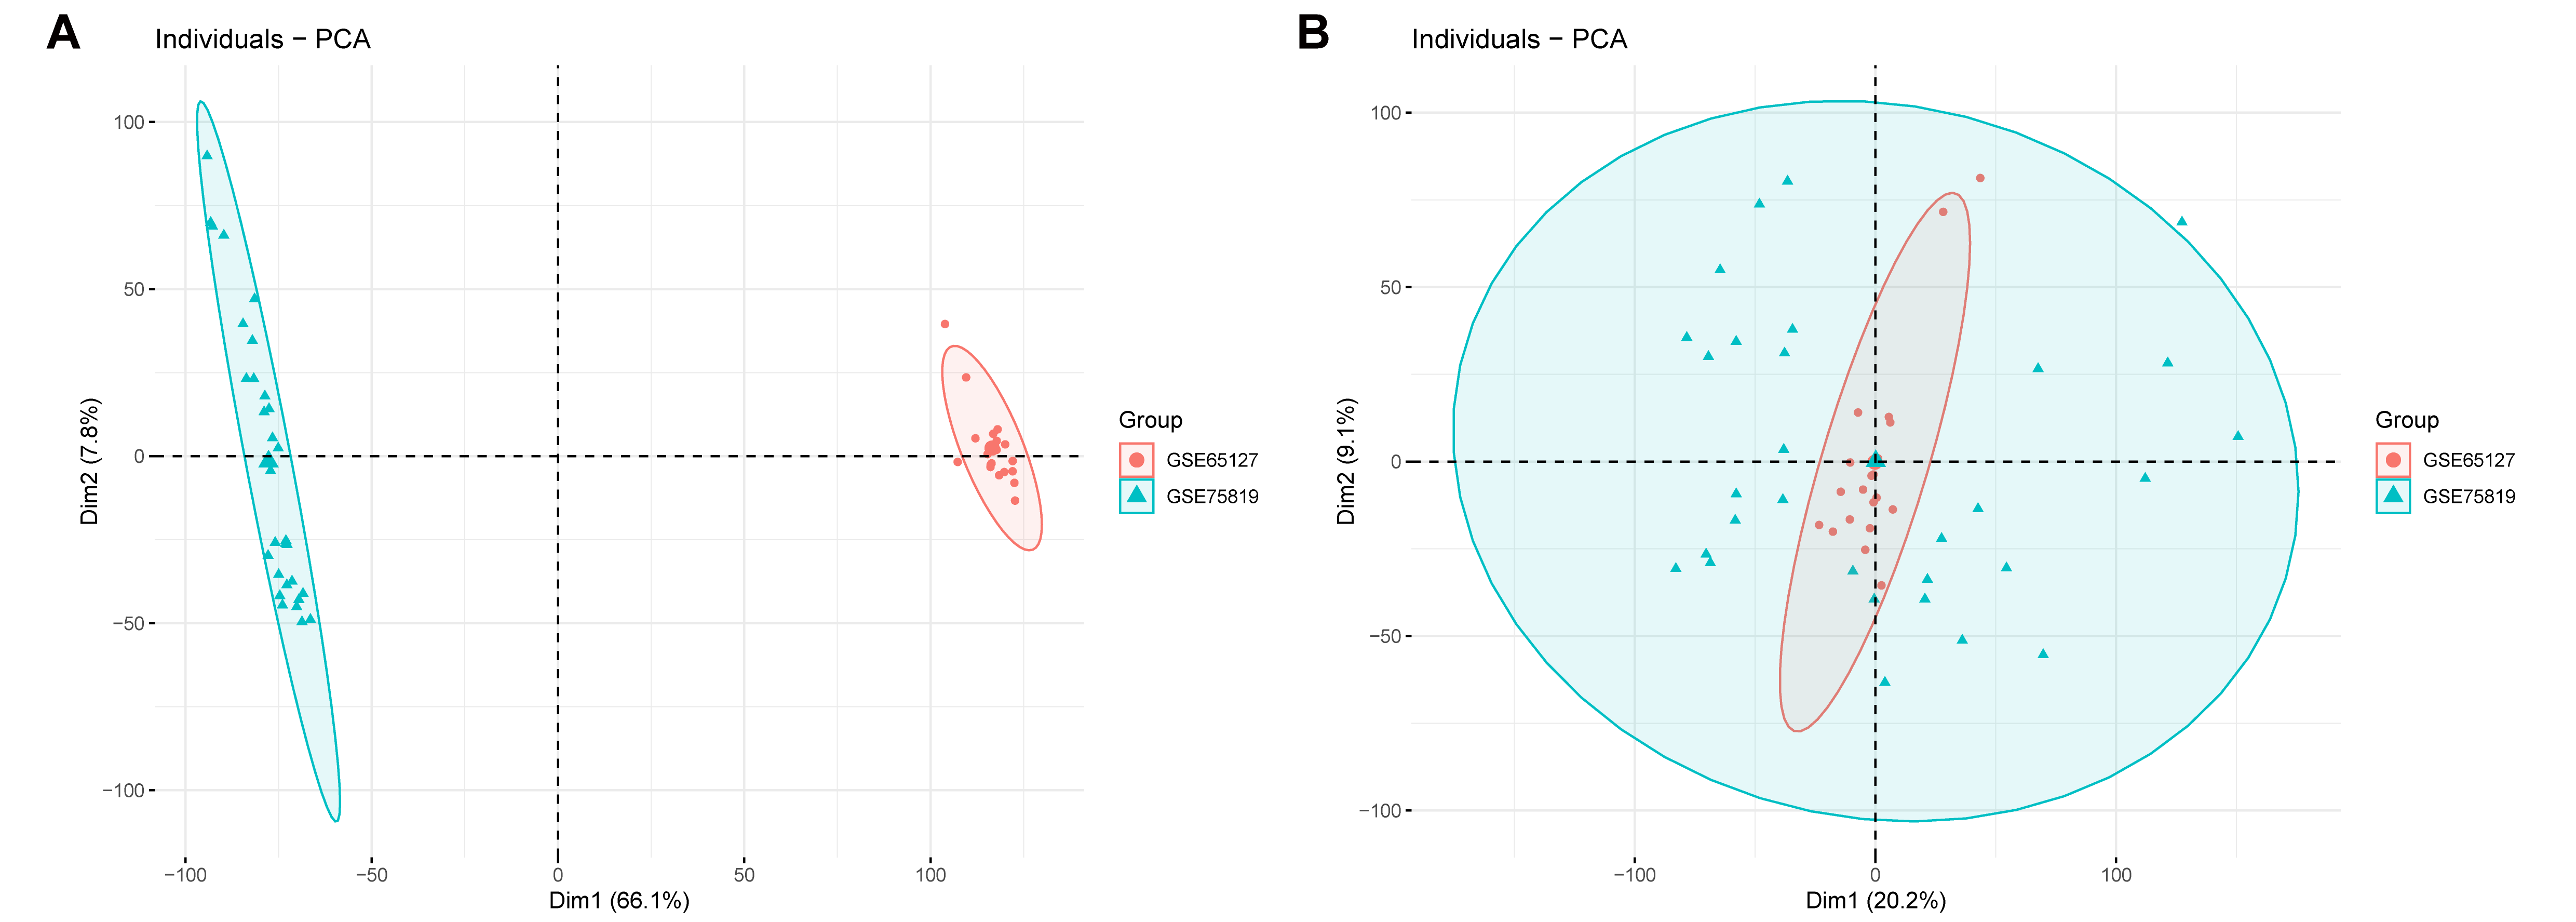
**

**Supplementary Figure 1. Removal of batch effects in vitiligo.** **(A, B)** Principal component analysis plots of samples from datasets GSE65127 and GSE75819 are shown (A) before and (B) after the removal of batch effects.

| **Supplementary Table 1.** The 58 overlapping DEGs identified in periodontitis and vitiligo. | | | |
| --- | --- | --- | --- |
| ARL9 | STX19 | GAS2L1 | GGH |
| KLHL21 | RGS1 | DYNLT3 | SERPINB8 |
| C12orf29 | ANKRD29 | POU2F3 | MARCKSL1 |
| C3orf14 | HS3ST6 | CYP2C18 | DAAM1 |
| C10orf99 | TAGLN | QPRT | DDIT4 |
| NRTN | PTGDS | CYFIP2 | DDX52 |
| ARG1 | SLC1A5 | WFS1 | SLK |
| GPSM2 | MAST1 | FCER1A | RGS2 |
| UCP2 | CD52 | CD207 | H1FX |
| CLCA4 | CCL5 | DEFB1 | GLRX |
| CD36 | PTPRZ1 | MTHFD2 | PSORS1C2 |
| PLD3 | CD69 | POSTN | ADH7 |
| RPTN | WDR66 | DCT | KRT15 |
| MLANA | IFI27 | CLPTM1 | COL6A2 |
| PTGS2 | TYRP1 |  |  |

| **Supplementary Table 2.** The 93 shared genes identified by integrating DEGs and key WGCNA module genes. | | | | | |
| --- | --- | --- | --- | --- | --- |
| GAS6 | SOD1 | ABLIM1 | SPCS2 | SRGN | PRDX4 |
| FABP5 | DBI | WFS1 | KLHL21 | VSNL1 | MAPT |
| ELL | UCHL3 | TUFT1 | AKR1B10 | POU2F3 | TXN |
| TM9SF1 | ABR | RPP40 | RPS27L | ALG5 | MKNK2 |
| UTP11L | TMEM14A | FAM57A | C3orf14 | SELK | EBPL |
| PVRL4 | FAM96A | C12orf45 | MTF1 | PARD6G | RAB40C |
| BTBD11 | ARL9 | LTB4R | LOC284023 | STX19 | GAS2L1 |
| GGH | RGS1 | DYNLT3 | SERPINB8 | C12orf29 | ANKRD29 |
| MARCKSL1 | HS3ST6 | CYP2C18 | DAAM1 | C10orf99 | TAGLN |
| QPRT | DDIT4 | NRTN | PTGDS | CYFIP2 | DDX52 |
| ARG1 | SLC1A5 | SLK | GPSM2 | MAST1 | FCER1A |
| RGS2 | UCP2 | CD52 | CD207 | H1FX | CLCA4 |
| CCL5 | DEFB1 | GLRX | CD36 | PTPRZ1 | MTHFD2 |
| PSORS1C2 | PLD3 | CD69 | POSTN | ADH7 | RPTN |
| WDR66 | DCT | KRT15 | MLANA | IFI27 | CLPTM1 |
| COL6A2 | PTGS2 | TYRP1 |  |  |  |

| **Supplementary Table 3.** The 570 potential therapeutic agents for the hub genes identified by the DSigDB database. | | | | |
| --- | --- | --- | --- | --- |
| **Term** | ***p*-value** | **Adjusted *p*-value** | **Combined Score** | **Genes** |
| cycloheximide CTD 00005731 | 4.21E-06 | 0.001281488 | 730615.4291 | PRDX4;CCL5;PTGS2 |
| hydrogen peroxide CTD 00006118 | 0.002384937 | 0.01606116 | 313891.5608 | PRDX4;CCL5;PTGS2 |
| quercetin CTD 00006679 | 0.003933621 | 0.01606116 | 279822.8361 | PRDX4;CCL5;PTGS2 |
| Tetradioxin CTD 00006848 | 0.006682774 | 0.01676417 | 243880.3814 | PRDX4;CCL5;PTGS2 |
| estradiol CTD 00005920 | 0.010184462 | 0.019415195 | 215547.2321 | PRDX4;CCL5;PTGS2 |
| Hydroxytyrosol CTD 00000267 | 4.50E-06 | 0.001281488 | 21384.7246 | CCL5;PTGS2 |
| Salbutamol CTD 00005336 | 1.23E-05 | 0.001604923 | 11572.79809 | CCL5;PTGS2 |
| Telmisartan CTD 00003021 | 1.29E-05 | 0.001604923 | 11234.2603 | CCL5;PTGS2 |
| Acetovanillone CTD 00002374 | 1.42E-05 | 0.001604923 | 10608.8227 | CCL5;PTGS2 |
| BUTHIONINE SULFOXIMINE CTD 00007280 | 1.69E-05 | 0.001604923 | 9531.856143 | CCL5;PTGS2 |
| chenodeoxycholic acid CTD 00005623 | 2.31E-05 | 0.001720114 | 7886.7062 | CCL5;PTGS2 |
| TACROLIMUS MONOHYDRATE CTD 00007118 | 2.47E-05 | 0.001720114 | 7553.893566 | CCL5;PTGS2 |
| DEOXYCHOLIC ACID CTD 00005765 | 2.74E-05 | 0.001720114 | 7100.033934 | PRDX4;PTGS2 |
| arecoline CTD 00005439 | 3.02E-05 | 0.001720114 | 6693.282857 | CCL5;PTGS2 |
| Lead dinitrate CTD 00000898 | 0.001649143 | 0.01606116 | 6403.334808 | PTGS2 |
| proscillaridin CTD 00006639 | 0.001649143 | 0.01606116 | 6403.334808 | CCL5 |
| ibuprofen TTD 00008500 | 0.001649143 | 0.01606116 | 6403.334808 | PTGS2 |
| BENZOYL PEROXIDE CTD 00005495 | 0.001649143 | 0.01606116 | 6403.334808 | PTGS2 |
| 2'-Hydroxychalcone TTD 00000428 | 0.001649143 | 0.01606116 | 6403.334808 | PTGS2 |
| 4,4'-METHYLENEBIS(2-CHLOROANILINE) CTD 00006314 | 0.001649143 | 0.01606116 | 6403.334808 | PTGS2 |
| Rev 5901 CTD 00002161 | 0.001649143 | 0.01606116 | 6403.334808 | PTGS2 |
| flunisolide CTD 00000364 | 0.001798976 | 0.01606116 | 5741.921288 | CCL5 |
| FERRIC CITRATE CTD 00001186 | 0.001798976 | 0.01606116 | 5741.921288 | PTGS2 |
| BENZIDINE CTD 00001406 | 0.001798976 | 0.01606116 | 5741.921288 | PTGS2 |
| 2,2',4,4'-TETRACHLOROBIPHENYL CTD 00001704 | 0.001798976 | 0.01606116 | 5741.921288 | PTGS2 |
| PLATINUM CTD 00006576 | 0.001798976 | 0.01606116 | 5741.921288 | PTGS2 |
| heme TTD 00008407 | 0.001798976 | 0.01606116 | 5741.921288 | PTGS2 |
| gamma-Tocopherol CTD 00007389 | 0.001798976 | 0.01606116 | 5741.921288 | PTGS2 |
| 2-Aminobiphenyl CTD 00000776 | 0.001798976 | 0.01606116 | 5741.921288 | PTGS2 |
| meloxicam CTD 00002644 | 0.001948794 | 0.01606116 | 5196.553512 | PTGS2 |
| 1,1,1-trifluorohenicosa-6,9,12,15-tetraen-2-one CTD 00002973 | 0.001948794 | 0.01606116 | 5196.553512 | PTGS2 |
| 1-BROMOPROPANE CTD 00003657 | 0.001948794 | 0.01606116 | 5196.553512 | PTGS2 |
| O,P'-DDE CTD 00002333 | 0.001948794 | 0.01606116 | 5196.553512 | PTGS2 |
| Acenaphthenequinone CTD 00001105 | 0.002098597 | 0.01606116 | 4739.656184 | PTGS2 |
| nimesulide TTD 00009677 | 0.002098597 | 0.01606116 | 4739.656184 | PTGS2 |
| methanol CTD 00005338 | 0.002098597 | 0.01606116 | 4739.656184 | PTGS2 |
| phenylbutazone TTD 00010195 | 0.002098597 | 0.01606116 | 4739.656184 | PTGS2 |
| Flufenamic acid-(benzoic ring-13C6) TTD 00008058 | 0.002098597 | 0.01606116 | 4739.656184 | PTGS2 |
| chitosamine CTD 00006030 | 5.47E-05 | 0.002832988 | 4653.082339 | CCL5;PTGS2 |
| CHEMBL55802 CTD 00003118 | 0.002248385 | 0.01606116 | 4351.685757 | PTGS2 |
| POVPC CTD 00003737 | 0.002248385 | 0.01606116 | 4351.685757 | PTGS2 |
| DIOSGENIN CTD 00005850 | 0.002248385 | 0.01606116 | 4351.685757 | PTGS2 |
| celecoxib TTD 00002754 | 0.002248385 | 0.01606116 | 4351.685757 | PTGS2 |
| alexidine CTD 00000048 | 0.002398159 | 0.01606116 | 4018.416231 | CCL5 |
| levamisole CTD 00006205 | 0.002398159 | 0.01606116 | 4018.416231 | PTGS2 |
| CHLOROBENZENE CTD 00001495 | 0.002398159 | 0.01606116 | 4018.416231 | PTGS2 |
| 5-(N,N-Hexamethylene)amiloride CTD 00002403 | 0.002398159 | 0.01606116 | 4018.416231 | PTGS2 |
| B-Octylglucoside TTD 00002290 | 0.002398159 | 0.01606116 | 4018.416231 | PTGS2 |
| Ursolic acid TTD 00011746 | 0.002398159 | 0.01606116 | 4018.416231 | PTGS2 |
| Calcimycin CTD 00005287 | 7.25E-05 | 0.003445183 | 3910.866105 | CCL5;PTGS2 |
| Palmatine CTD 00000225 | 0.002547917 | 0.01606116 | 3729.253306 | CCL5 |
| Brucinum CTD 00003015 | 0.002547917 | 0.01606116 | 3729.253306 | PTGS2 |
| ferulic acid CTD 00000186 | 0.002547917 | 0.01606116 | 3729.253306 | PTGS2 |
| kaempferol CTD 00000297 | 8.32E-05 | 0.003647397 | 3593.910941 | CCL5;PTGS2 |
| paroxetine CTD 00007180 | 0.00269766 | 0.01606116 | 3476.150033 | PTGS2 |
| Tylophorine CTD 00000134 | 0.00269766 | 0.01606116 | 3476.150033 | PTGS2 |
| Mollugin CTD 00002058 | 0.00269766 | 0.01606116 | 3476.150033 | PTGS2 |
| AC1L1WKQ CTD 00007050 | 0.00269766 | 0.01606116 | 3476.150033 | PTGS2 |
| Oligomycin CTD 00006434 | 0.00269766 | 0.01606116 | 3476.150033 | PTGS2 |
| 2-arachidonoylglycerol CTD 00003218 | 0.00269766 | 0.01606116 | 3476.150033 | PTGS2 |
| hesperidin CTD 00006087 | 0.00269766 | 0.01606116 | 3476.150033 | PTGS2 |
| Nebivolol CTD 00002249 | 0.00269766 | 0.01606116 | 3476.150033 | PTGS2 |
| 76180-96-6 CTD 00001374 | 0.00269766 | 0.01606116 | 3476.150033 | PTGS2 |
| 1-(5-ISOQUINOLINESULFONYL)-2-METHYLPIPERAZINE CTD 00007271 | 0.002847389 | 0.01606116 | 3252.888057 | PTGS2 |
| cannabidiol CTD 00005567 | 0.002847389 | 0.01606116 | 3252.888057 | PTGS2 |
| Methoxycamptothecin CTD 00001213 | 0.002847389 | 0.01606116 | 3252.888057 | PTGS2 |
| prazosin CTD 00006604 | 0.002847389 | 0.01606116 | 3252.888057 | CCL5 |
| dequalinium CTD 00005770 | 0.002847389 | 0.01606116 | 3252.888057 | CCL5 |
| p,p'-DDD CTD 00005753 | 0.002847389 | 0.01606116 | 3252.888057 | PTGS2 |
| TRIAMCINOLONE ACETONIDE CTD 00006922 | 0.002997102 | 0.01606116 | 3054.58855 | CCL5 |
| 16,16-dimethylprostaglandin E2 PC3 UP | 0.002997102 | 0.01606116 | 3054.58855 | PTGS2 |
| domperidone PC3 UP | 0.002997102 | 0.01606116 | 3054.58855 | PTGS2 |
| Sodium salicylate CTD 00006761 | 0.002997102 | 0.01606116 | 3054.58855 | PTGS2 |
| acetaminophen | 0.003146801 | 0.01606116 | 2877.37169 | PTGS2 |
| metoprolol CTD 00006326 | 0.003146801 | 0.01606116 | 2877.37169 | PTGS2 |
| formoterol CTD 00000665 | 0.003146801 | 0.01606116 | 2877.37169 | CCL5 |
| Anandamide CTD 00002912 | 0.003146801 | 0.01606116 | 2877.37169 | PTGS2 |
| Shogaol CTD 00001852 | 0.003146801 | 0.01606116 | 2877.37169 | PTGS2 |
| Polydatin CTD 00002437 | 0.003146801 | 0.01606116 | 2877.37169 | PTGS2 |
| etodolac CTD 00007163 | 0.003146801 | 0.01606116 | 2877.37169 | PTGS2 |
| Dinoprostone CTD 00007049 | 1.20E-04 | 0.004866016 | 2871.761121 | CCL5;PTGS2 |
| pyrimethamine PC3 UP | 0.003296484 | 0.01606116 | 2718.11468 | PTGS2 |
| ticlopidine MCF7 UP | 0.003296484 | 0.01606116 | 2718.11468 | CCL5 |
| Amentoflavone CTD 00000591 | 0.003296484 | 0.01606116 | 2718.11468 | PTGS2 |
| Aluminium sulfate CTD 00001900 | 0.003296484 | 0.01606116 | 2718.11468 | PTGS2 |
| glutathione CTD 00006035 | 1.37E-04 | 0.005028607 | 2637.005409 | CCL5;PTGS2 |
| ursodiol CTD 00006973 | 1.41E-04 | 0.005028607 | 2589.424594 | CCL5;PTGS2 |
| indomethacin | 0.003446153 | 0.01606116 | 2574.276639 | PTGS2 |
| 5-Aminosalicylic acid | 0.003446153 | 0.01606116 | 2574.276639 | PTGS2 |
| tracazolate HL60 DOWN | 0.003446153 | 0.01606116 | 2574.276639 | PTGS2 |
| Chonsurid CTD 00005665 | 0.003446153 | 0.01606116 | 2574.276639 | PTGS2 |
| clioquinol HL60 UP | 0.003446153 | 0.01606116 | 2574.276639 | PTGS2 |
| CUMENE HYDROPEROXIDE CTD 00000338 | 0.003446153 | 0.01606116 | 2574.276639 | PTGS2 |
| 2H-1-Benzopyran-2-one, 7-[(3,7-dimethyl-2,6-octadienyl)oxy]- CTD 00003446 | 0.003595807 | 0.01606116 | 2443.769793 | PTGS2 |
| Prolinedithiocarbamate CTD 00002658 | 0.003595807 | 0.01606116 | 2443.769793 | PTGS2 |
| Clopidogrelum [Latin] CTD 00002343 | 0.003595807 | 0.01606116 | 2443.769793 | CCL5 |
| HEXANE CTD 00001239 | 0.003595807 | 0.01606116 | 2443.769793 | CCL5 |
| etoposide HL60 UP | 1.60E-04 | 0.005371045 | 2392.961653 | CCL5;PTGS2 |
| FEXOFENADINE HYDROCHLORIDE CTD 00003191 | 0.003745445 | 0.01606116 | 2324.863325 | CCL5 |
| naloxone CTD 00006373 | 0.003745445 | 0.01606116 | 2324.863325 | CCL5 |
| 5-hydroxy-1-(4-hydroxy-3-methoxyphenyl)decan-3-one CTD 00000374 | 0.003745445 | 0.01606116 | 2324.863325 | PTGS2 |
| Sphingosine 1-phosphate CTD 00002508 | 0.003745445 | 0.01606116 | 2324.863325 | PTGS2 |
| EMETINE CTD 00005892 | 0.003745445 | 0.01606116 | 2324.863325 | CCL5 |
| ketoprofen CTD 00006192 | 0.003745445 | 0.01606116 | 2324.863325 | PTGS2 |
| Lonafarnib CTD 00003616 | 0.003745445 | 0.01606116 | 2324.863325 | PTGS2 |
| trihexyphenidyl PC3 UP | 0.003895069 | 0.01606116 | 2216.110625 | PTGS2 |
| Bis-gma CTD 00007186 | 0.003895069 | 0.01606116 | 2216.110625 | PTGS2 |
| desipramine CTD 00005772 | 0.003895069 | 0.01606116 | 2216.110625 | CCL5 |
| Antimycin A CTD 00005427 | 0.003895069 | 0.01606116 | 2216.110625 | CCL5 |
| Anacardic acid C15:3 CTD 00003117 | 0.003895069 | 0.01606116 | 2216.110625 | PTGS2 |
| Vanadic sulfate CTD 00001628 | 1.83E-04 | 0.005786877 | 2203.723465 | CCL5;PTGS2 |
| DL-Thyroxine CTD 00006892 | 0.004044678 | 0.01606116 | 2116.293582 | PTGS2 |
| Benzo(a)pyrene 7,8-dihydrodiol CTD 00000887 | 0.004044678 | 0.01606116 | 2116.293582 | PTGS2 |
| phenylbutazone CTD 00006518 | 0.004044678 | 0.01606116 | 2116.293582 | PTGS2 |
| 2,6,9,9-tetramethylcycloundeca-2,6,10-trien-1-one CTD 00003763 | 0.004044678 | 0.01606116 | 2116.293582 | PTGS2 |
| Ici 118551 CTD 00001255 | 0.004044678 | 0.01606116 | 2116.293582 | PTGS2 |
| bisindolylmaleimide IX CTD 00002617 | 0.004044678 | 0.01606116 | 2116.293582 | PTGS2 |
| niflumic acid CTD 00006396 | 0.004044678 | 0.01606116 | 2116.293582 | PTGS2 |
| Evodiamine CTD 00002158 | 0.004044678 | 0.01606116 | 2116.293582 | PTGS2 |
| Dienogest CTD 00001099 | 0.004044678 | 0.01606116 | 2116.293582 | PTGS2 |
| cinnamaldehyde CTD 00000671 | 2.02E-04 | 0.006055508 | 2070.519767 | CCL5;PTGS2 |
| NSC321521 CTD 00005452 | 0.004194272 | 0.01606116 | 2024.379431 | PTGS2 |
| STREPTOZOTOCIN CTD 00006786 | 0.004194272 | 0.01606116 | 2024.379431 | PRDX4 |
| fluphenazine PC3 UP | 0.004194272 | 0.01606116 | 2024.379431 | PTGS2 |
| 15442-64-5 CTD 00000915 | 0.004194272 | 0.01606116 | 2024.379431 | PTGS2 |
| PROPIDIUM CTD 00006632 | 0.004194272 | 0.01606116 | 2024.379431 | CCL5 |
| prochlorperazine PC3 UP | 0.004343851 | 0.01606116 | 1939.487001 | PTGS2 |
| Honokiol CTD 00000234 | 0.004343851 | 0.01606116 | 1939.487001 | PTGS2 |
| benfluorex MCF7 UP | 0.004343851 | 0.01606116 | 1939.487001 | CCL5 |
| 2-methoxy-13-methyl-6,7,8,9,11,12,14,15,16,17-decahydrocyclopenta[a]phenanthrene-3,17-diol CTD 00001063 | 0.004343851 | 0.01606116 | 1939.487001 | PRDX4 |
| lanatoside C CTD 00000952 | 0.004343851 | 0.01606116 | 1939.487001 | CCL5 |
| CALCIUM CTD 00005559 | 2.35E-04 | 0.006665922 | 1882.16107 | CCL5;PTGS2 |
| primaquine HL60 UP | 0.004493415 | 0.01606116 | 1860.860041 | PTGS2 |
| succinylsulfathiazole PC3 UP | 0.004493415 | 0.01606116 | 1860.860041 | CCL5 |
| 1'-Acetoxychavicol acetate CTD 00002113 | 0.004493415 | 0.01606116 | 1860.860041 | PTGS2 |
| bepridil PC3 UP | 0.004493415 | 0.01606116 | 1860.860041 | PTGS2 |
| Digitoxigenin CTD 00005821 | 0.004493415 | 0.01606116 | 1860.860041 | CCL5 |
| clomipramine PC3 UP | 2.46E-04 | 0.006665922 | 1830.179422 | CCL5;PTGS2 |
| 2,2',3,4,4',5'-HEXACHLOROBIPHENYL CTD 00001404 | 0.004642964 | 0.01606116 | 1787.845974 | PTGS2 |
| 2,4-Diisocyanato-1-methylbenzene CTD 00006908 | 0.004642964 | 0.01606116 | 1787.845974 | CCL5 |
| peptidoglycan CTD 00006490 | 0.004642964 | 0.01606116 | 1787.845974 | PTGS2 |
| gsno CTD 00007396 | 0.004642964 | 0.01606116 | 1787.845974 | CCL5 |
| sodium fluoride CTD 00006755 | 0.004792498 | 0.01606116 | 1719.878826 | PTGS2 |
| minocycline CTD 00006338 | 0.004792498 | 0.01606116 | 1719.878826 | CCL5 |
| colforsin PC3 UP | 0.004792498 | 0.01606116 | 1719.878826 | PTGS2 |
| NAPROXEN CTD 00006380 | 0.004792498 | 0.01606116 | 1719.878826 | PTGS2 |
| Methyl 4-methoxycinnamate CTD 00002989 | 0.004942017 | 0.01606116 | 1656.465408 | PTGS2 |
| 3-Aminofluoranthene CTD 00002071 | 0.004942017 | 0.01606116 | 1656.465408 | CCL5 |
| flufenamic acid CTD 00005976 | 0.004942017 | 0.01606116 | 1656.465408 | PTGS2 |
| AH 6809 CTD 00002290 | 0.004942017 | 0.01606116 | 1656.465408 | PTGS2 |
| EGTA CTD 00005889 | 0.004942017 | 0.01606116 | 1656.465408 | CCL5 |
| AH 23848 CTD 00002080 | 0.004942017 | 0.01606116 | 1656.465408 | PTGS2 |
| suramin CTD 00006822 | 0.005091521 | 0.01606116 | 1597.174051 | PTGS2 |
| MANCOZEB CTD 00000687 | 0.005091521 | 0.01606116 | 1597.174051 | PTGS2 |
| BISPHENOL A DIGLYCIDYL ETHER CTD 00000976 | 0.005091521 | 0.01606116 | 1597.174051 | PTGS2 |
| Xanthohumol CTD 00003425 | 0.005091521 | 0.01606116 | 1597.174051 | PTGS2 |
| bisacodyl PC3 UP | 0.005091521 | 0.01606116 | 1597.174051 | PTGS2 |
| chloropyramine PC3 UP | 0.005091521 | 0.01606116 | 1597.174051 | PTGS2 |
| SB 203580 TTD 00010833 | 0.005091521 | 0.01606116 | 1597.174051 | PTGS2 |
| fluticasone CTD 00002635 | 0.005091521 | 0.01606116 | 1597.174051 | CCL5 |
| dimethyl sulfoxide CTD 00005842 | 3.18E-04 | 0.008229643 | 1555.285578 | CCL5;PTGS2 |
| Entinostat CTD 00003662 | 0.00524101 | 0.01606116 | 1541.625367 | PTGS2 |
| ritodrine PC3 UP | 0.00524101 | 0.01606116 | 1541.625367 | PTGS2 |
| N-formylmethionylleucylphenylalanine CTD 00006360 | 0.00524101 | 0.01606116 | 1541.625367 | PTGS2 |
| Tributyltin CTD 00000610 | 0.00524101 | 0.01606116 | 1541.625367 | PTGS2 |
| Methylbenzethonium chloride CTD 00000197 | 0.00524101 | 0.01606116 | 1541.625367 | CCL5 |
| clonidine PC3 UP | 0.00524101 | 0.01606116 | 1541.625367 | CCL5 |
| isoliquiritigenin CTD 00001873 | 0.00524101 | 0.01606116 | 1541.625367 | PTGS2 |
| Go 6976 CTD 00002962 | 0.00524101 | 0.01606116 | 1541.625367 | PTGS2 |
| phenylarsine oxide CTD 00001378 | 0.005390484 | 0.016430888 | 1489.484609 | PTGS2 |
| celecoxib | 0.005539943 | 0.01646168 | 1440.455342 | PTGS2 |
| trifluoperazine PC3 UP | 0.005539943 | 0.01646168 | 1440.455342 | PTGS2 |
| STOCK1N-35696 PC3 UP | 0.005539943 | 0.01646168 | 1440.455342 | PTGS2 |
| furazolidone HL60 DOWN | 0.005539943 | 0.01646168 | 1440.455342 | PTGS2 |
| Beryllium sulfate CTD 00001005 | 0.005689388 | 0.01646168 | 1394.274145 | CCL5 |
| 362-05-0 CTD 00000041 | 0.005689388 | 0.01646168 | 1394.274145 | PTGS2 |
| OZONE CTD 00006460 | 0.005689388 | 0.01646168 | 1394.274145 | PTGS2 |
| clenbuterol HL60 UP | 0.005689388 | 0.01646168 | 1394.274145 | PTGS2 |
| ketoconazole HL60 DOWN | 0.005689388 | 0.01646168 | 1394.274145 | PTGS2 |
| PHENCYCLIDINE CTD 00005881 | 3.79E-04 | 0.009381078 | 1391.031025 | CCL5;PTGS2 |
| 1,2-NAPHTHOQUINONE CTD 00001871 | 0.005838817 | 0.016620916 | 1350.70617 | PTGS2 |
| oxidopamine CTD 00007130 | 0.005838817 | 0.016620916 | 1350.70617 | PTGS2 |
| Ammonium hexachloroplatinate(IV) CTD 00000945 | 0.005838817 | 0.016620916 | 1350.70617 | PTGS2 |
| Aflodac CTD 00006817 | 4.06E-04 | 0.009636819 | 1330.68659 | CCL5;PTGS2 |
| propylthiouracil PC3 DOWN | 0.005988231 | 0.016731823 | 1309.541399 | CCL5 |
| linolenic acid CTD 00007213 | 0.005988231 | 0.016731823 | 1309.541399 | PTGS2 |
| Pregna-4,17(20)-diene-3,16-dione CTD 00001094 | 0.005988231 | 0.016731823 | 1309.541399 | PTGS2 |
| 1-chloro-2,4-dinitrobenzene CTD 00005848 | 4.34E-04 | 0.009893479 | 1274.761149 | CCL5;PTGS2 |
| 1-butanol CTD 00007334 | 0.006137631 | 0.016745788 | 1270.591461 | PTGS2 |
| Equol CTD 00007470 | 0.006137631 | 0.016745788 | 1270.591461 | PTGS2 |
| RUTIN CTD 00006712 | 0.006137631 | 0.016745788 | 1270.591461 | PTGS2 |
| benzethonium chloride CTD 00005485 | 0.006137631 | 0.016745788 | 1270.591461 | CCL5 |
| rimexolone HL60 DOWN | 0.006287015 | 0.016745788 | 1233.68694 | PTGS2 |
| DIALLYL DISULFIDE CTD 00001321 | 0.006287015 | 0.016745788 | 1233.68694 | PTGS2 |
| Allyl sulfide CTD 00001796 | 0.006287015 | 0.016745788 | 1233.68694 | PTGS2 |
| busulfan CTD 00005543 | 0.006287015 | 0.016745788 | 1233.68694 | PTGS2 |
| 124020-07-1 CTD 00007038 | 0.006287015 | 0.016745788 | 1233.68694 | PTGS2 |
| Acteoside CTD 00002463 | 0.006287015 | 0.016745788 | 1233.68694 | PTGS2 |
| 1,3,5[10]-Estratriene-3,4,17 beta-triol CTD 00000733 | 0.006436385 | 0.016752234 | 1198.67506 | PTGS2 |
| Cleland's reagent CTD 00005862 | 0.006436385 | 0.016752234 | 1198.67506 | PTGS2 |
| 9,12-Octadecadienoic acid CTD 00007296 | 0.006436385 | 0.016752234 | 1198.67506 | PTGS2 |
| atenolol CTD 00005448 | 0.006436385 | 0.016752234 | 1198.67506 | PTGS2 |
| octopamine PC3 DOWN | 0.006436385 | 0.016752234 | 1198.67506 | CCL5 |
| Rhein CTD 00001002 | 0.006585739 | 0.01676417 | 1165.417706 | PTGS2 |
| etynodiol HL60 DOWN | 0.006585739 | 0.01676417 | 1165.417706 | PTGS2 |
| 3-[3-butylsulfanyl-1-[(4-chlorophenyl)methyl]-5-propan-2-ylindol-2-yl]-2,2-dimethylpropanoic acid TTD 00000826 | 0.006585739 | 0.01676417 | 1165.417706 | PTGS2 |
| STYRENE CTD 00001125 | 0.006585739 | 0.01676417 | 1165.417706 | PTGS2 |
| PD 98059 CTD 00003206 | 5.08E-04 | 0.011146373 | 1151.453682 | CCL5;PTGS2 |
| 22-Hydroxycholesterol CTD 00000121 | 0.006735079 | 0.01676417 | 1133.789719 | PTGS2 |
| p,p'-DDE CTD 00005754 | 0.006735079 | 0.01676417 | 1133.789719 | PTGS2 |
| flurbiprofen CTD 00005993 | 0.006735079 | 0.01676417 | 1133.789719 | PTGS2 |
| 2-CHLOROETHYL ETHYL SULFIDE CTD 00001489 | 0.006735079 | 0.01676417 | 1133.789719 | PTGS2 |
| SB 202190 TTD 00010831 | 0.006735079 | 0.01676417 | 1133.789719 | PTGS2 |
| 2-[6-fluoro-2-methyl-3-[(4-methylsulfonylphenyl)methylidene]inden-1-yl]acetic acid CTD 00001194 | 0.006884403 | 0.016841674 | 1103.677423 | PTGS2 |
| catechol CTD 00001636 | 0.006884403 | 0.016841674 | 1103.677423 | CCL5 |
| cloperastine PC3 UP | 0.006884403 | 0.016841674 | 1103.677423 | PTGS2 |
| Inosinic acid BOSS | 0.006884403 | 0.016841674 | 1103.677423 | CCL5 |
| Ursolic acid CTD 00000232 | 0.007033713 | 0.016916525 | 1074.977344 | PTGS2 |
| p-benzoquinone CTD 00000148 | 0.007033713 | 0.016916525 | 1074.977344 | CCL5 |
| mitotane CTD 00006344 | 0.007033713 | 0.016916525 | 1074.977344 | PTGS2 |
| nifedipine HL60 DOWN | 0.007033713 | 0.016916525 | 1074.977344 | PTGS2 |
| pizotifen PC3 UP | 0.007183008 | 0.016988857 | 1047.595101 | PTGS2 |
| carboplatin CTD 00007106 | 0.007183008 | 0.016988857 | 1047.595101 | PTGS2 |
| Resveratrol-13C6 TTD 00010554 | 0.007183008 | 0.016988857 | 1047.595101 | PTGS2 |
| butyric acid CTD 00007353 | 0.007183008 | 0.016988857 | 1047.595101 | PTGS2 |
| Platelet activating factor BOSS | 0.007332288 | 0.017128705 | 1021.444434 | CCL5 |
| clioquinol PC3 UP | 0.007332288 | 0.017128705 | 1021.444434 | PTGS2 |
| EMBELIN CTD 00000580 | 0.007332288 | 0.017128705 | 1021.444434 | PTGS2 |
| dihydroergotamine HL60 DOWN | 6.35E-04 | 0.013415274 | 996.9693185 | PRDX4;CCL5 |
| oxytetracycline CTD 00006459 | 0.007481552 | 0.017265121 | 996.4463578 | CCL5 |
| 506-26-3 CTD 00007216 | 0.007481552 | 0.017265121 | 996.4463578 | PTGS2 |
| propranolol CTD 00006636 | 0.007481552 | 0.017265121 | 996.4463578 | PTGS2 |
| budesonide CTD 00007317 | 0.007630802 | 0.017459138 | 972.5284118 | CCL5 |
| parthenolide CTD 00000087 | 0.007630802 | 0.017459138 | 972.5284118 | PTGS2 |
| simvastatin CTD 00007319 | 6.84E-04 | 0.013922281 | 950.5376483 | CCL5;PTGS2 |
| suloctidil PC3 UP | 0.007780037 | 0.017459138 | 949.624009 | PTGS2 |
| (-)-isoprenaline PC3 UP | 0.007780037 | 0.017459138 | 949.624009 | PTGS2 |
| 0179445-0000 PC3 UP | 0.007780037 | 0.017459138 | 949.624009 | PTGS2 |
| dinoprostone PC3 UP | 0.007780037 | 0.017459138 | 949.624009 | PTGS2 |
| norepinephrine CTD 00006417 | 0.007780037 | 0.017459138 | 949.624009 | CCL5 |
| Melitten CTD 00006261 | 0.007929257 | 0.01757528 | 927.6718551 | PTGS2 |
| LY-294002 HL60 DOWN | 0.007929257 | 0.01757528 | 927.6718551 | PRDX4 |
| alprostadil PC3 UP | 0.007929257 | 0.01757528 | 927.6718551 | PTGS2 |
| Fulvestrant CTD 00002740 | 7.11E-04 | 0.013947953 | 926.7568011 | CCL5;PTGS2 |
| N-Acetyl-L-cysteine CTD 00005305 | 7.34E-04 | 0.013947953 | 907.7105566 | CCL5;PTGS2 |
| p-Phenylenediamine CTD 00001400 | 0.008078462 | 0.01757528 | 906.6154367 | PTGS2 |
| trimipramine PC3 UP | 0.008078462 | 0.01757528 | 906.6154367 | PTGS2 |
| Indole-3-carbinol CTD 00000845 | 0.008078462 | 0.01757528 | 906.6154367 | PTGS2 |
| ethaverine HL60 DOWN | 0.008078462 | 0.01757528 | 906.6154367 | PTGS2 |
| 2,4-Dinitrofluorobenzene CTD 00005849 | 0.008078462 | 0.01757528 | 906.6154367 | PTGS2 |
| INDIRUBIN-3'-MONOXIME CTD 00004181 | 0.008227652 | 0.017831793 | 886.4025679 | PTGS2 |
| CAPECITABINE CTD 00003557 | 0.008376827 | 0.018086331 | 866.9849864 | PTGS2 |
| miconazole | 0.008525987 | 0.018246589 | 848.3179948 | PTGS2 |
| Paricalcitol CTD 00003033 | 0.008525987 | 0.018246589 | 848.3179948 | PTGS2 |
| quinisocaine PC3 UP | 0.008675133 | 0.018246589 | 830.3601395 | PTGS2 |
| Tyrphostin B42 CTD 00003234 | 0.008675133 | 0.018246589 | 830.3601395 | PTGS2 |
| alpha-Tocopherol CTD 00007387 | 0.008675133 | 0.018246589 | 830.3601395 | PTGS2 |
| GW9662 CTD 00004071 | 0.008675133 | 0.018246589 | 830.3601395 | PTGS2 |
| gossypol PC3 UP | 0.008675133 | 0.018246589 | 830.3601395 | PTGS2 |
| DL-Homocysteine CTD 00006102 | 0.008824263 | 0.018357043 | 813.0729239 | CCL5 |
| Pterostilbene CTD 00003490 | 0.008824263 | 0.018357043 | 813.0729239 | PTGS2 |
| Nitroprusside CTD 00006411 | 0.008824263 | 0.018357043 | 813.0729239 | PTGS2 |
| 1h-pyrazolo[3,4-d]pyrimidine CTD 00000742 | 0.009122478 | 0.01890841 | 780.3696945 | PTGS2 |
| Lead dichloride CTD 00001407 | 0.009271564 | 0.018940011 | 764.8892871 | CCL5 |
| toluene CTD 00006907 | 0.009271564 | 0.018940011 | 764.8892871 | PTGS2 |
| caffeic acid CTD 00001850 | 0.009271564 | 0.018940011 | 764.8892871 | PTGS2 |
| bisindolylmaleimide i CTD 00002749 | 0.009420634 | 0.018940011 | 749.9503377 | PTGS2 |
| digoxin CTD 00005825 | 0.009420634 | 0.018940011 | 749.9503377 | CCL5 |
| dequalinium chloride HL60 DOWN | 0.009420634 | 0.018940011 | 749.9503377 | PTGS2 |
| Dibenziodolium CTD 00000351 | 0.009420634 | 0.018940011 | 749.9503377 | PTGS2 |
| valsartan CTD 00002971 | 0.009420634 | 0.018940011 | 749.9503377 | PTGS2 |
| chlorpyrifos CTD 00005880 | 0.00956969 | 0.018940011 | 735.5257597 | PTGS2 |
| alexidine PC3 UP | 0.00956969 | 0.018940011 | 735.5257597 | PTGS2 |
| FCCP CTD 00005590 | 0.00956969 | 0.018940011 | 735.5257597 | PTGS2 |
| ionomycin BOSS | 0.00956969 | 0.018940011 | 735.5257597 | CCL5 |
| Gallic acid CTD 00006020 | 0.00956969 | 0.018940011 | 735.5257597 | PTGS2 |
| Mangiferin CTD 00000713 | 0.00971873 | 0.019102332 | 721.5902191 | PTGS2 |
| DL-Mevalonic acid CTD 00006329 | 0.00971873 | 0.019102332 | 721.5902191 | PTGS2 |
| syrosingopine PC3 UP | 0.009867756 | 0.019131363 | 708.1199963 | PTGS2 |
| Masoprocol CTD 00006416 | 0.009867756 | 0.019131363 | 708.1199963 | PTGS2 |
| Melatonin CTD 00006260 | 0.009867756 | 0.019131363 | 708.1199963 | PTGS2 |
| h-89 CTD 00002586 | 0.009867756 | 0.019131363 | 708.1199963 | PTGS2 |
| Chromium(II) chloride CTD 00000877 | 0.010016767 | 0.019289044 | 695.0928601 | CCL5 |
| beclomethasone CTD 00005468 | 0.010016767 | 0.019289044 | 695.0928601 | CCL5 |
| Mehp CTD 00000849 | 0.010165762 | 0.019415195 | 682.4879536 | PTGS2 |
| histamine CTD 00006100 | 0.010165762 | 0.019415195 | 682.4879536 | PTGS2 |
| Benz[a]anthracene CTD 00001470 | 0.010314743 | 0.019532902 | 670.285691 | PTGS2 |
| triclosan CTD 00006933 | 0.010314743 | 0.019532902 | 670.285691 | PTGS2 |
| NICKEL CHLORIDE CTD 00001064 | 0.001175285 | 0.01606116 | 666.1279154 | CCL5;PTGS2 |
| 170449-18-0 CTD 00003361 | 0.010463709 | 0.019684205 | 658.4676625 | PTGS2 |
| mephentermine HL60 UP | 0.010463709 | 0.019684205 | 658.4676625 | PTGS2 |
| PHOSPHINE CTD 00006547 | 0.01061266 | 0.01976868 | 647.0165481 | PTGS2 |
| Perfluorooctanesulfonic acid CTD 00002876 | 0.01061266 | 0.01976868 | 647.0165481 | PTGS2 |
| fluoxetine CTD 00005988 | 0.01061266 | 0.01976868 | 647.0165481 | CCL5 |
| rosiglitazone CTD 00003139 | 0.001246628 | 0.01606116 | 640.5431758 | CCL5;PTGS2 |
| Sodium dodecyl sulfate CTD 00006753 | 0.010761596 | 0.01978745 | 635.916039 | CCL5 |
| profenamine PC3 UP | 0.010761596 | 0.01978745 | 635.916039 | PTGS2 |
| baicalein CTD 00000302 | 0.010761596 | 0.01978745 | 635.916039 | PTGS2 |
| chlorpromazine PC3 UP | 0.010761596 | 0.01978745 | 635.916039 | PTGS2 |
| nimesulide CTD 00000666 | 0.010910517 | 0.019996767 | 625.1507651 | PTGS2 |
| dexamethasone CTD 00005779 | 0.001307664 | 0.01606116 | 620.4696369 | CCL5;PTGS2 |
| rottlerin CTD 00003057 | 0.011059423 | 0.020012289 | 614.7062292 | PTGS2 |
| DMBA CTD 00007046 | 0.011059423 | 0.020012289 | 614.7062292 | CCL5 |
| ns-398 CTD 00002958 | 0.011059423 | 0.020012289 | 614.7062292 | PTGS2 |
| imidurea PC3 DOWN | 0.011059423 | 0.020012289 | 614.7062292 | CCL5 |
| Vorinostat CTD 00003560 | 0.00133248 | 0.01606116 | 612.7368352 | PRDX4;PTGS2 |
| thiram CTD 00006883 | 0.01135719 | 0.020421446 | 594.7253886 | PTGS2 |
| beta-escin PC3 UP | 0.01135719 | 0.020421446 | 594.7253886 | PTGS2 |
| vanoxerine PC3 UP | 0.011506051 | 0.020559402 | 585.1639325 | PTGS2 |
| STOCK1N-35215 PC3 UP | 0.011506051 | 0.020559402 | 585.1639325 | PTGS2 |
| quercetin PC3 UP | 0.011654898 | 0.020760287 | 575.8728137 | CCL5 |
| morphine CTD 00006352 | 0.011803729 | 0.0208948 | 566.8410825 | CCL5 |
| clonidine HL60 UP | 0.011803729 | 0.0208948 | 566.8410825 | PTGS2 |
| hyoscyamine HL60 DOWN | 0.012101347 | 0.021318172 | 549.514823 | CCL5 |
| yohimbic acid PC3 DOWN | 0.012250134 | 0.02148485 | 541.2011252 | CCL5 |
| bay 11-7082 CTD 00003959 | 0.012398905 | 0.021679068 | 533.1084107 | PTGS2 |
| Phorbol 12-myristate 13-acetate CTD 00006852 | 0.001718099 | 0.01606116 | 516.6292268 | CCL5;PTGS2 |
| nifedipine CTD 00006395 | 0.012845131 | 0.022390595 | 510.0740472 | PTGS2 |
| clotrimazole | 0.012993843 | 0.022496239 | 502.7851268 | PTGS2 |
| calcitriol BOSS | 0.012993843 | 0.022496239 | 502.7851268 | CCL5 |
| IN1152 CTD 00001901 | 0.01314254 | 0.022496239 | 495.6790189 | PTGS2 |
| GW-8510 PC3 UP | 0.01314254 | 0.022496239 | 495.6790189 | PTGS2 |
| GNF-Pf-4325 CTD 00005408 | 0.01314254 | 0.022496239 | 495.6790189 | CCL5 |
| IBMX CTD 00007018 | 0.01314254 | 0.022496239 | 495.6790189 | PTGS2 |
| 3-(1-methylpyrrolidin-2-yl)pyridine CTD 00006393 | 0.001832942 | 0.01606116 | 494.5100402 | CCL5;PTGS2 |
| Chlorophenothane CTD 00005755 | 0.013439889 | 0.022598043 | 481.9892581 | PTGS2 |
| chrysin CTD 00001976 | 0.013439889 | 0.022598043 | 481.9892581 | PTGS2 |
| Heparitin BOSS | 0.013439889 | 0.022598043 | 481.9892581 | CCL5 |
| fenofibrate CTD 00006620 | 0.013439889 | 0.022598043 | 481.9892581 | CCL5 |
| 4-Aminobiphenyl CTD 00000311 | 0.013439889 | 0.022598043 | 481.9892581 | PTGS2 |
| azacyclonol PC3 UP | 0.013439889 | 0.022598043 | 481.9892581 | PTGS2 |
| 7,8-Benzoflavone CTD 00000606 | 0.013588541 | 0.022713983 | 475.3933631 | PTGS2 |
| SB 202190 CTD 00003161 | 0.013588541 | 0.022713983 | 475.3933631 | PTGS2 |
| Diallyl trisulfide CTD 00001934 | 0.013737178 | 0.022762185 | 468.9557624 | PTGS2 |
| clotrimazole PC3 UP | 0.013737178 | 0.022762185 | 468.9557624 | PTGS2 |
| bezafibrate CTD 00005506 | 0.013737178 | 0.022762185 | 468.9557624 | CCL5 |
| Deguelin CTD 00003487 | 0.0138858 | 0.022941757 | 462.6710098 | PTGS2 |
| Gefitinib CTD 00003879 | 0.014183 | 0.023297724 | 450.5394671 | PTGS2 |
| valinomycin PC3 UP | 0.014183 | 0.023297724 | 450.5394671 | PTGS2 |
| 2-Naphthalenamine CTD 00007026 | 0.014331578 | 0.023474136 | 444.6829485 | CCL5 |
| hydrocortisone CTD 00006117 | 0.014480141 | 0.023581943 | 438.9597969 | PTGS2 |
| lovastatin CTD 00006225 | 0.014480141 | 0.023581943 | 438.9597969 | PTGS2 |
| rofecoxib CTD 00003631 | 0.014777221 | 0.023997197 | 427.8963601 | PTGS2 |
| N-acetyl-L-aspartic acid PC3 DOWN | 0.014925739 | 0.024032969 | 422.5479098 | CCL5 |
| myricetin CTD 00001847 | 0.014925739 | 0.024032969 | 422.5479098 | PTGS2 |
| mefloquine PC3 UP | 0.014925739 | 0.024032969 | 422.5479098 | PTGS2 |
| METHAMPHETAMINE CTD 00006286 | 0.015074242 | 0.024135724 | 417.3164777 | PTGS2 |
| 1,2,4-BENZENETRIOL CTD 00000682 | 0.015074242 | 0.024135724 | 417.3164777 | CCL5 |
| astemizole PC3 UP | 0.01522273 | 0.024305199 | 412.1983924 | PTGS2 |
| NICKEL SULFATE CTD 00001417 | 0.002436547 | 0.01606116 | 407.2179814 | CCL5;PTGS2 |
| 3,3'-Diindolylmethane CTD 00000841 | 0.015519661 | 0.024710075 | 402.2883173 | PTGS2 |
| Imatinib CTD 00003267 | 0.015668104 | 0.024807832 | 397.4897035 | PTGS2 |
| nitric oxide CTD 00006402 | 0.015668104 | 0.024807832 | 397.4897035 | CCL5 |
| Tanshinone I CTD 00001048 | 0.015816533 | 0.024973473 | 392.7911748 | PTGS2 |
| (2E,4E,6E,8E)-3,7-DIMETHYL-9-(2,6,6-TRIMETHYL-3-OXO-1-CYCLOHEXENYL)NONA-2,4,6,8-TETRAENOIC ACID CTD 00000070 | 0.015964946 | 0.025138175 | 388.1897375 | PTGS2 |
| 4-PHENYLBUTYRIC ACID CTD 00002847 | 0.016113345 | 0.025232435 | 383.6825141 | PTGS2 |
| methylbenzethonium chloride PC3 UP | 0.016113345 | 0.025232435 | 383.6825141 | PTGS2 |
| sertraline CTD 00007358 | 0.016261728 | 0.025325642 | 379.2667383 | PTGS2 |
| docetaxel CTD 00002688 | 0.016410097 | 0.025487071 | 374.9397489 | PTGS2 |
| benzene CTD 00005481 | 0.002774292 | 0.01606116 | 372.3346797 | CCL5;PTGS2 |
| prenylamine PC3 UP | 0.016558451 | 0.025508964 | 370.6989858 | PTGS2 |
| hexachlorophene | 0.016558451 | 0.025508964 | 370.6989858 | PTGS2 |
| Pioglitazone CTD 00002515 | 0.016558451 | 0.025508964 | 370.6989858 | CCL5 |
| ionomycin CTD 00007090 | 0.016706789 | 0.025599113 | 366.5419846 | CCL5 |
| buflomedil PC3 UP | 0.016706789 | 0.025599113 | 366.5419846 | CCL5 |
| salicylic acid BOSS | 0.016855113 | 0.025757144 | 362.4663724 | CCL5 |
| caffeine CTD 00005556 | 0.017151716 | 0.026070609 | 354.550257 | PTGS2 |
| LITHOCHOLIC ACID CTD 00006221 | 0.017151716 | 0.026070609 | 354.550257 | PTGS2 |
| celecoxib CTD 00003448 | 0.017299996 | 0.026226057 | 350.7054294 | PTGS2 |
| camptothecin CTD 00005566 | 0.01744826 | 0.026380658 | 346.9333349 | CCL5 |
| troglitazone CTD 00002415 | 0.003105067 | 0.01606116 | 344.3121265 | CCL5;PTGS2 |
| luteolin CTD 00007430 | 0.017892963 | 0.026910261 | 336.0340615 | PTGS2 |
| azacitidine PC3 UP | 0.017892963 | 0.026910261 | 336.0340615 | PTGS2 |
| deferoxamine CTD 00005759 | 0.018337533 | 0.027506299 | 325.7223629 | PTGS2 |
| raloxifene CTD 00007367 | 0.00344408 | 0.01606116 | 320.2512387 | CCL5;PTGS2 |
| daidzein CTD 00000166 | 0.018930083 | 0.028246459 | 312.8107755 | PTGS2 |
| 0297417-0002B PC3 UP | 0.018930083 | 0.028246459 | 312.8107755 | PTGS2 |
| acetaldehyde CTD 00005293 | 0.019226268 | 0.028535848 | 306.6871566 | PTGS2 |
| cantharidin HL60 UP | 0.019226268 | 0.028535848 | 306.6871566 | PTGS2 |
| DEOXYNIVALENOL CTD 00000341 | 0.019374339 | 0.028535848 | 303.7036203 | PTGS2 |
| colchicine HL60 DOWN | 0.019374339 | 0.028535848 | 303.7036203 | PRDX4 |
| Chromium(VI) CTD 00002830 | 0.019374339 | 0.028535848 | 303.7036203 | PTGS2 |
| co-dergocrine mesilate HL60 UP | 0.019670435 | 0.028897289 | 297.8867663 | PTGS2 |
| 3,4-DICHLOROANILINE CTD 00000754 | 0.020114468 | 0.029473642 | 289.5192282 | PTGS2 |
| MeIQx CTD 00001739 | 0.020262449 | 0.029538609 | 286.8209556 | PTGS2 |
| dihydroergotamine HL60 UP | 0.020262449 | 0.029538609 | 286.8209556 | PTGS2 |
| ACROLEIN CTD 00005313 | 0.020706303 | 0.030108655 | 278.9842061 | PTGS2 |
| thalidomide CTD 00006858 | 0.021002131 | 0.030461106 | 273.964998 | PTGS2 |
| diuron CTD 00005864 | 0.0212979 | 0.030811682 | 269.1014436 | PTGS2 |
| Vitinoin CTD 00007069 | 0.004439114 | 0.01606116 | 267.6480687 | CCL5;PTGS2 |
| TITANIUM DIOXIDE CTD 00000489 | 0.021593609 | 0.031160397 | 264.3866679 | CCL5 |
| tonzonium bromide PC3 UP | 0.021741441 | 0.031215671 | 262.0830316 | PTGS2 |
| wortmannin CTD 00000504 | 0.021741441 | 0.031215671 | 262.0830316 | PTGS2 |
| ibuprofen CTD 00006137 | 0.022184848 | 0.03177227 | 255.3778871 | PTGS2 |
| 635-65-4 CTD 00005510 | 0.022480378 | 0.032114826 | 251.0719872 | PRDX4 |
| carisoprodol BOSS | 0.023218944 | 0.033086995 | 240.8426305 | CCL5 |
| Pyrrolidine dithiocarbamate CTD 00001021 | 0.023661904 | 0.033634129 | 235.0475078 | PTGS2 |
| eugenol CTD 00005949 | 0.023957137 | 0.033969075 | 231.3173351 | PTGS2 |
| liothyronine CTD 00006943 | 0.024104731 | 0.03409354 | 229.4906395 | CCL5 |
| Adehl CTD 00006002 | 0.02425231 | 0.034217369 | 227.6888664 | PTGS2 |
| Bortezomib CTD 00003736 | 0.005606602 | 0.01646168 | 226.3005435 | CCL5;PTGS2 |
| Silica CTD 00006678 | 0.00586106 | 0.016620916 | 219.1253433 | CCL5;PTGS2 |
| diphenylpyraline BOSS | 0.024989983 | 0.034998256 | 219.0372056 | CCL5 |
| niclosamide PC3 UP | 0.024989983 | 0.034998256 | 219.0372056 | PTGS2 |
| arachidonic acid CTD 00007139 | 0.024989983 | 0.034998256 | 219.0372056 | PTGS2 |
| tobramycin PC3 DOWN | 0.025137473 | 0.035118528 | 217.375153 | CCL5 |
| bicalutamide CTD 00002279 | 0.025284948 | 0.035152245 | 215.7348586 | PTGS2 |
| staurosporine CTD 00007273 | 0.025284948 | 0.035152245 | 215.7348586 | PTGS2 |
| hydroquinone CTD 00001535 | 0.025579853 | 0.035265762 | 212.5179211 | CCL5 |
| morphine BOSS | 0.025579853 | 0.035265762 | 212.5179211 | CCL5 |
| astemizole MCF7 UP | 0.025727284 | 0.035265762 | 210.9404912 | CCL5 |
| MG-132 CTD 00002789 | 0.025727284 | 0.035265762 | 210.9404912 | PTGS2 |
| COBALT CTD 00005696 | 0.025727284 | 0.035265762 | 210.9404912 | PTGS2 |
| ciclopirox HL60 UP | 0.026316857 | 0.035972682 | 204.828953 | PTGS2 |
| O,P'-DDT CTD 00000838 | 0.026464213 | 0.036087563 | 203.3488284 | PTGS2 |
| PhIP CTD 00002156 | 0.026611554 | 0.036201875 | 201.887123 | PTGS2 |
| IRON CTD 00006166 | 0.02675888 | 0.036229363 | 200.4435083 | CCL5 |
| histamine BOSS | 0.02675888 | 0.036229363 | 200.4435083 | CCL5 |
| 1,9-Pyrazoloanthrone CTD 00003948 | 0.026906192 | 0.036342487 | 199.0176634 | PTGS2 |
| 17-Hydroxyandrostan-3-one CTD 00006776 | 0.027789749 | 0.037447179 | 190.8187044 | PTGS2 |
| NICKEL CTD 00006389 | 0.028084149 | 0.037597794 | 188.2144744 | PTGS2 |
| hydrogen peroxide BOSS | 0.028084149 | 0.037597794 | 188.2144744 | PRDX4 |
| actinomycin D CTD 00005748 | 0.028231326 | 0.037597794 | 186.9352781 | PTGS2 |
| ciglitazone CTD 00001835 | 0.028231326 | 0.037597794 | 186.9352781 | PTGS2 |
| HEXACHLOROETHANE BOSS | 0.028231326 | 0.037597794 | 186.9352781 | CCL5 |
| AGN-PC-0JHFVD BOSS | 0.028378489 | 0.037617997 | 185.6710185 | CCL5 |
| trimethoprim BOSS | 0.028378489 | 0.037617997 | 185.6710185 | CCL5 |
| cyclosporin A BOSS | 0.028525637 | 0.037637993 | 184.4214457 | CCL5 |
| Isoguanine BOSS | 0.028525637 | 0.037637993 | 184.4214457 | CCL5 |
| cerivastatin BOSS | 0.02867277 | 0.037744755 | 183.1863154 | CCL5 |
| PIPERONYL BUTOXIDE BOSS | 0.028819889 | 0.037801881 | 181.9653884 | CCL5 |
| thioridazine PC3 UP | 0.029114081 | 0.037801881 | 179.5652139 | PTGS2 |
| MANGANESE CHLORIDE CTD 00001187 | 0.029114081 | 0.037801881 | 179.5652139 | PTGS2 |
| Dinoprostone BOSS | 0.029114081 | 0.037801881 | 179.5652139 | CCL5 |
| R-atenolol PC3 UP | 0.029114081 | 0.037801881 | 179.5652139 | CCL5 |
| water BOSS | 0.029114081 | 0.037801881 | 179.5652139 | CCL5 |
| dexamethasone BOSS | 0.0299963 | 0.038858844 | 172.6822427 | CCL5 |
| Pentadecafluorooctanoic acid CTD 00001078 | 0.030143285 | 0.038872562 | 171.5791942 | PTGS2 |
| Vitamin D3 BOSS | 0.030143285 | 0.038872562 | 171.5791942 | CCL5 |
| temozolomide CTD 00002088 | 0.030290255 | 0.038973917 | 170.4882203 | PTGS2 |
| Capsaicin CTD 00005570 | 0.03058415 | 0.039263436 | 168.3417435 | PTGS2 |
| Sodium dichromate CTD 00000827 | 0.030877985 | 0.039551577 | 166.241344 | CCL5 |
| Alitretinoin CTD 00003402 | 0.031465479 | 0.040123765 | 162.1731944 | PTGS2 |
| (-)-Epigallocatechin gallate BOSS | 0.031465479 | 0.040123765 | 162.1731944 | CCL5 |
| MANGANESE CTD 00006240 | 0.031612315 | 0.040131446 | 161.1828199 | PTGS2 |
| PARAQUAT CTD 00006471 | 0.031612315 | 0.040131446 | 161.1828199 | PTGS2 |
| Mustard gas CTD 00006356 | 0.031759136 | 0.040228239 | 160.2027902 | CCL5 |
| progesterone BOSS | 0.03278647 | 0.041437446 | 153.6196158 | CCL5 |
| EINECS 250-892-2 CTD 00001193 | 0.033079861 | 0.041715754 | 151.8234808 | PTGS2 |
| tolazoline PC3 UP | 0.033226534 | 0.041716133 | 150.9388664 | CCL5 |
| [6-[6-(butanoylamino)purin-9-yl]-2-hydroxy-2-oxo-4a,6,7,7a-tetrahydro-4H-furo[3,2-d][1,3,2]dioxaphosphinin-7-yl] butanoate CTD 00005796 | 0.033226534 | 0.041716133 | 150.9388664 | PTGS2 |
| LY 294002 CTD 00003061 | 0.033666464 | 0.04217557 | 148.3373111 | PTGS2 |
| FENRETINIDE CTD 00007166 | 0.033813077 | 0.042266347 | 147.4871458 | PTGS2 |
| LITHIUM CHLORIDE CTD 00007226 | 0.034252829 | 0.042629067 | 144.9860508 | PTGS2 |
| ethanol CTD 00005337 | 0.034252829 | 0.042629067 | 144.9860508 | PTGS2 |
| 1-NITROPYRENE CTD 00001569 | 0.034692448 | 0.043082125 | 142.5566824 | CCL5 |
| spiperone PC3 UP | 0.034985453 | 0.04335154 | 140.9755039 | PTGS2 |
| 3,3',4,4',5-Pentachlorobiphenyl CTD 00001077 | 0.035131933 | 0.043438616 | 140.196122 | PTGS2 |
| puromycin HL60 DOWN | 0.035571285 | 0.04388665 | 137.9016045 | PRDX4 |
| digoxigenin HL60 UP | 0.03615688 | 0.044512789 | 134.9404696 | PTGS2 |
| arsenite CTD 00000779 | 0.012117698 | 0.021318172 | 127.1499802 | CCL5;PTGS2 |
| ascorbic acid CTD 00005445 | 0.038643014 | 0.047470944 | 123.4848926 | PTGS2 |
| picrotoxinin PC3 UP | 0.039373415 | 0.048235733 | 120.4271671 | CCL5 |
| digoxin HL60 UP | 0.039519451 | 0.048235733 | 119.8310471 | PTGS2 |
| niclosamide HL60 DOWN | 0.039519451 | 0.048235733 | 119.8310471 | PRDX4 |
| puromycin HL60 UP | 0.040541288 | 0.04937721 | 115.7948489 | PTGS2 |
| melphalan CTD 00006262 | 0.041270728 | 0.050158454 | 113.0509353 | PTGS2 |
| cyclophosphamide CTD 00005734 | 0.041416571 | 0.050228607 | 112.5153679 | PTGS2 |
| valproic acid HL60 UP | 0.042728497 | 0.051709647 | 107.8824533 | PTGS2 |
| digoxigenin PC3 UP | 0.043748057 | 0.05283134 | 104.4976744 | PTGS2 |
| zuclopenthixol PC3 UP | 0.04447587 | 0.053483641 | 102.1883145 | CCL5 |
| helveticoside HL60 UP | 0.04447587 | 0.053483641 | 102.1883145 | PTGS2 |
| VITAMIN E CTD 00006994 | 0.01623098 | 0.025325642 | 101.0478655 | PRDX4;CCL5 |
| 17-Ethynyl estradiol CTD 00005932 | 0.044912381 | 0.053894857 | 100.8437375 | PTGS2 |
| mitomycin C CTD 00007136 | 0.045494188 | 0.054478334 | 99.09684209 | PTGS2 |
| pergolide HL60 UP | 0.046075759 | 0.055059083 | 97.40038744 | PTGS2 |
| proscillaridin HL60 UP | 0.047673861 | 0.0567309 | 92.97879553 | PTGS2 |
| 8-azaguanine PC3 UP | 0.047673861 | 0.0567309 | 92.97879553 | PTGS2 |
| helveticoside PC3 UP | 0.047819055 | 0.056785128 | 92.59361257 | PTGS2 |
| menadione HL60 UP | 0.049270178 | 0.058316085 | 88.88471357 | PTGS2 |
| cyclopenthiazide PC3 UP | 0.049415209 | 0.058316085 | 88.52756591 | CCL5 |
| indomethacin CTD 00006147 | 0.049415209 | 0.058316085 | 88.52756591 | PTGS2 |
| pergolide HL60 DOWN | 0.050285086 | 0.05922004 | 86.4343364 | PRDX4 |
| strophanthidin HL60 UP | 0.050719826 | 0.059608868 | 85.41864478 | PTGS2 |
| mebendazole HL60 UP | 0.051009579 | 0.059826049 | 84.75257795 | PTGS2 |
| minoxidil PC3 UP | 0.054626514 | 0.063936577 | 77.10853954 | CCL5 |
| nocodazole HL60 UP | 0.054915471 | 0.064143071 | 76.54700038 | PTGS2 |
| cicloheximide PC3 UP | 0.055637606 | 0.064853651 | 75.17259714 | PTGS2 |
| ouabain HL60 UP | 0.055781989 | 0.064889253 | 74.90264923 | PTGS2 |
| sanguinarine HL60 UP | 0.056503683 | 0.065594907 | 73.57681159 | PTGS2 |
| Medroxyprogesterone acetate CTD 00006623 | 0.057225009 | 0.066297266 | 72.2895958 | PTGS2 |
| progesterone CTD 00006624 | 0.02573782 | 0.035265762 | 69.19363398 | CCL5;PTGS2 |
| Dronabinol CTD 00006853 | 0.059098736 | 0.068329167 | 69.11244702 | PTGS2 |
| alprostadil HL60 UP | 0.060106636 | 0.069353811 | 67.49646871 | PTGS2 |
| lanatoside C PC3 UP | 0.060394476 | 0.069545154 | 67.04624465 | PTGS2 |
| ouabain PC3 UP | 0.061113817 | 0.070231604 | 65.94220337 | PTGS2 |
| digitoxigenin HL60 UP | 0.061832791 | 0.070914871 | 64.86795731 | PTGS2 |
| Zoledronic acid CTD 00003127 | 0.062407706 | 0.071430507 | 64.02924994 | PTGS2 |
| diclofenac CTD 00005804 | 0.062695075 | 0.071615617 | 63.61660081 | PTGS2 |
| 8-azaguanine HL60 UP | 0.062838738 | 0.071636161 | 63.41192276 | PTGS2 |
| MS-275 PC3 UP | 0.063269638 | 0.07198342 | 62.80437551 | PTGS2 |
| lanatoside C HL60 UP | 0.063413242 | 0.072003083 | 62.60399501 | PTGS2 |
| primaquine PC3 UP | 0.063700406 | 0.07218535 | 62.206389 | CCL5 |
| emetine HL60 DOWN | 0.063843966 | 0.072204485 | 62.00914781 | PRDX4 |
| scopolamine PC3 UP | 0.066568817 | 0.07513708 | 58.44905061 | CCL5 |
| pregnenolone PC3 UP | 0.066855335 | 0.075311346 | 58.09394582 | CCL5 |
| strophanthidin PC3 UP | 0.067285003 | 0.075645861 | 57.56790723 | PTGS2 |
| digitoxigenin PC3 UP | 0.070717598 | 0.079037316 | 53.62699374 | CCL5 |
| digoxin PC3 UP | 0.070717598 | 0.079037316 | 53.62699374 | PTGS2 |
| thapsigargin PC3 UP | 0.07086044 | 0.079041978 | 53.47246018 | PTGS2 |
| paclitaxel CTD 00007144 | 0.072145357 | 0.080318073 | 52.1138782 | PTGS2 |
| ajmaline HL60 DOWN | 0.072573399 | 0.08063711 | 51.67353981 | PRDX4 |
| Dasatinib CTD 00004330 | 0.073429089 | 0.081429145 | 50.81091718 | CCL5 |
| lycorine PC3 UP | 0.074284252 | 0.082217522 | 49.97159695 | PTGS2 |
| cephaeline PC3 UP | 0.075138889 | 0.083002261 | 49.15469528 | PTGS2 |
| oxygen CTD 00006454 | 0.076562114 | 0.084410842 | 47.84074654 | PTGS2 |
| curcumin CTD 00000663 | 0.077130995 | 0.084873875 | 47.33112782 | PTGS2 |
| piroxicam CTD 00006571 | 0.080113789 | 0.087986242 | 44.79493851 | PTGS2 |
| puromycin PC3 UP | 0.080539377 | 0.088283547 | 44.45068081 | PTGS2 |
| Tamibarotene CTD 00002527 | 0.081531905 | 0.089199972 | 43.66391085 | CCL5 |
| aspirin CTD 00005447 | 0.081815353 | 0.089338604 | 43.44326325 | PTGS2 |
| methotrexate CTD 00006299 | 0.090010005 | 0.098098858 | 37.75196105 | CCL5 |
| amiodarone CTD 00005381 | 0.090854934 | 0.098830748 | 37.23234747 | PTGS2 |
| 8-Bromo-cAMP, Na CTD 00007044 | 0.094650642 | 0.102763555 | 35.03026601 | PTGS2 |
| trichostatin A HL60 UP | 0.096754797 | 0.104848354 | 33.8956512 | PTGS2 |
| vorinostat HL60 UP | 0.105138814 | 0.113717503 | 29.89491862 | PTGS2 |
| doxorubicin CTD 00005874 | 0.108338881 | 0.116956746 | 28.55708294 | PTGS2 |
| formaldehyde CTD 00006001 | 0.068271778 | 0.076604161 | 28.2848512 | CCL5;PTGS2 |
| cephaeline HL60 UP | 0.110699237 | 0.119278951 | 27.62809726 | PTGS2 |
| tamoxifen CTD 00006827 | 0.115545672 | 0.1242661 | 25.85935341 | PTGS2 |
| sulfaguanidine PC3 UP | 0.116512841 | 0.124997631 | 25.52699598 | CCL5 |
| emetine HL60 UP | 0.122025998 | 0.130496846 | 23.75019261 | PTGS2 |
| ARSENIC CTD 00005442 | 0.122576049 | 0.130839603 | 23.58322036 | PTGS2 |
| lycorine HL60 UP | 0.123812823 | 0.131912727 | 23.21417213 | PTGS2 |
| Cianidanol CTD 00005600 | 0.124911202 | 0.132816542 | 22.89364261 | PTGS2 |
| Demecolcine CTD 00005762 | 0.125734383 | 0.133213009 | 22.65775248 | CCL5 |
| anisomycin PC3 UP | 0.12888513 | 0.136297818 | 21.78768125 | PTGS2 |
| zalcitabine PC3 UP | 0.129295538 | 0.136478623 | 21.67803462 | CCL5 |
| 67526-95-8 CTD 00007263 | 0.136252765 | 0.143556518 | 19.93766986 | PTGS2 |
| Enterolactone CTD 00001393 | 0.13869938 | 0.145864662 | 19.37464899 | PRDX4 |
| Retinoic acid CTD 00006918 | 0.116664456 | 0.124997631 | 15.89229529 | CCL5;PTGS2 |
| phenobarbital CTD 00006510 | 0.159977256 | 0.167623228 | 15.3287509 | PRDX4 |
| CADMIUM CTD 00005555 | 0.161712195 | 0.168820423 | 15.05453373 | PTGS2 |
| anisomycin HL60 UP | 0.161712195 | 0.168820423 | 15.05453373 | PTGS2 |
| benzo[a]pyrene CTD 00005488 | 0.125127163 | 0.132816542 | 14.64109702 | CCL5;PTGS2 |
| 5-Fluorouracil CTD 00005987 | 0.169688651 | 0.17682364 | 13.88016512 | PTGS2 |
| genistein CTD 00007324 | 0.173525732 | 0.180492093 | 13.36141267 | PTGS2 |
| vincristine CTD 00006988 | 0.175373877 | 0.182082168 | 13.12133498 | CCL5 |
| Bisphenol A CTD 00000312 | 0.177614347 | 0.184073051 | 12.8383995 | PTGS2 |
| Arsenenous acid CTD 00000922 | 0.180376379 | 0.186596254 | 12.50131063 | PTGS2 |
| cyclosporin A CTD 00007121 | 0.146507843 | 0.153792763 | 12.08556601 | PRDX4;PTGS2 |
| metronidazole PC3 UP | 0.184704209 | 0.190727173 | 11.99767703 | PTGS2 |
| TERT-BUTYL HYDROPEROXIDE CTD 00007349 | 0.187972706 | 0.193751252 | 11.63597065 | PTGS2 |
| Pirinixic acid CTD 00000280 | 0.195911153 | 0.201569237 | 10.81842559 | PTGS2 |
| lobeline HL60 DOWN | 0.209838908 | 0.21551023 | 9.565090529 | PRDX4 |
| resveratrol CTD 00002483 | 0.221448719 | 0.227024766 | 8.667081009 | PTGS2 |
| ZINC CTD 00007011 | 0.226642134 | 0.231931807 | 8.302051941 | PTGS2 |
| COPPER CTD 00005706 | 0.232441342 | 0.237440081 | 7.918328147 | CCL5 |
| Decitabine CTD 00000750 | 0.24643977 | 0.251289211 | 7.084159001 | PTGS2 |
| COUMESTROL CTD 00005717 | 0.247929426 | 0.252356737 | 7.002318689 | PRDX4 |
| calcitriol CTD 00005558 | 0.265896615 | 0.270162336 | 6.105427877 | PTGS2 |
| (-)-Epigallocatechin gallate CTD 00002033 | 0.284775715 | 0.288829461 | 5.315489483 | PTGS2 |
| atrazine CTD 00005450 | 0.382416143 | 0.387170873 | 2.758681735 | PRDX4 |
| AFLATOXIN B1 CTD 00007128 | 0.394627678 | 0.398825845 | 2.553512797 | PTGS2 |
| 7646-79-9 CTD 00000928 | 0.396022131 | 0.399526752 | 2.531187314 | PTGS2 |
| trichostatin A CTD 00000660 | 0.447034282 | 0.450193535 | 1.844158467 | PTGS2 |
| METHYL METHANESULFONATE CTD 00006307 | 0.474851071 | 0.477363511 | 1.555250062 | PRDX4 |
| acetaminophen CTD 00005295 | 0.500869961 | 0.502633588 | 1.326538137 | PTGS2 |
| Copper sulfate CTD 00007279 | 0.658196157 | 0.659352917 | 0.48611832 | PRDX4 |
| VALPROIC ACID CTD 00006977 | 0.800434449 | 0.800434449 | 0.156498078 | PTGS2 |
